# Supplementary material for: The influence of subpolar marine ice expansion on global climate in the Early Pleistocene
Source: Springer Nature journal article supplement (doi:10.1038/s41612-024-00589-2), 2024-02-17
Supplement: 41612_2024_589_MOESM1_ESM.pdf [file 41612_2024_589_MOESM1_ESM.pdf]

# Supporting Information for

## The influence of subpolar marine ice expansion on global climate in the Early Pleistocene

Wenxia Han<sup>1,2\*</sup>, Jinbo Zan<sup>3\*</sup>, David B. Kemp<sup>4</sup>, Tao Zhang<sup>5</sup>, Zhixiang Wang<sup>1</sup>, Li Mai<sup>1</sup>, Xiaomin Fang<sup>3</sup>

<sup>1</sup> Key Laboratory of Green and High-end Utilization of Salt Lake Resources, Qinghai Institute of Salt Lake, Chinese Academy of Sciences, Xining, 810008, China;

<sup>2</sup> Shandong Provincial Key Laboratory of Water and Soil Conservation and Environmental Protection, College of Resources and Environment Sciences, Linyi University, Linyi, 276000, PR China;

<sup>3</sup> State Key Laboratory of Tibetan Plateau Earth System Science, Resources and Environment (LTPE-SRE), Institute of Tibetan Plateau Research, Chinese Academy of Sciences, Beijing 100101, China;

<sup>4</sup> State Key Laboratory for Biogeology and Environmental Geology and Hubei Key Laboratory of Critical Zone Evolution, School of Earth Sciences, China University of Geosciences (Wuhan), Wuhan, China;

<sup>5</sup> School of Earth Sciences & Key Laboratory of Western China's Mineral Resources of Gansu Province, Lanzhou University, Lanzhou, China;

### Supplementary Figures

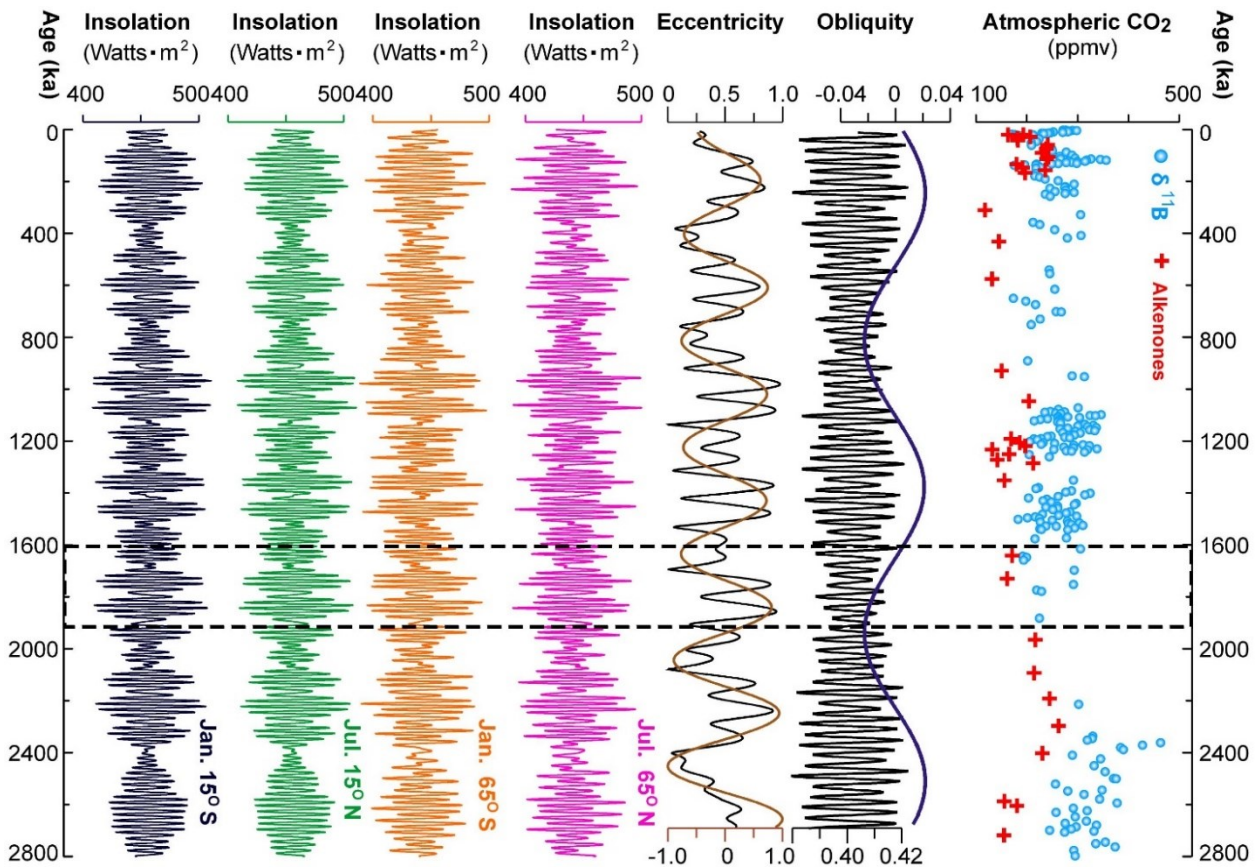

Figure 1. Plot showing variations in insolation at different latitudes, as well as Earth's long (405-kyr, brown) and short (100-kyr, black) eccentricity and obliquity (black) and filtered 1.2-Myr variations (dark blue)<sup>1</sup>. Atmospheric CO<sub>2</sub> concentrations<sup>2</sup> during the past 2.8 Ma were also shown.

28  
29  
30  
31  
32

## Supplementary Tables

Table 1 Identified regime shift events based on recurrence analysis of global climate and oceanographic records.

| Proxies and locations                                                      | Identified regime shift events |      |      |     |
|----------------------------------------------------------------------------|--------------------------------|------|------|-----|
|                                                                            | I                              | II   | III  | IV  |
| coarse size fraction (>30 $\mu\text{m}$ ) from the Western Kunlun Mountain | 2.4                            | 1.7  | 1.1  | –   |
| Mn <sub>HOAC</sub> record from the Qaidam Basin                            | 2.2                            | 1.75 | 1.2  | 0.6 |
| Magnetic susceptibility record from the Chinese Loess Plateau              | 2.1                            | 1.7  | 1.2  | –   |
| dust flux record from the ODP Site 722 in the Indian Ocean                 | 2.1                            | 1.65 | 1.25 | –   |
| K content from the IODP Site U1422 in the Japan Sea                        | 2.25                           | 1.65 | 1.2  | 0.6 |
| dust flux record from ODP Site 1146 in the South China Sea                 | –                              | 1.7  | 1.3  | –   |
| dust flux record from Site 967 in the Eastern Mediterranean                | –                              | 1.9  | 1.15 | –   |
| LR04 marine $\delta^{18}\text{O}$ data                                     | –                              | 1.65 | –    | 0.6 |
| ice-rafted debris record from the ODP Site 907 in the Nordic Seas          | 2.2                            | 1.6  | 1.25 | –   |
| SST record of the ODP site 982                                             | –                              | 1.7  | 1.2  | 0.4 |
| SST record of the ODP site 1125                                            | 2.2                            | 1.6  | 1.2  | –   |
| SST record of the ODP site 1090                                            | 2.2                            | 1.6  | 1.2  | –   |

33  
34  
35  
36  
37  
38

## References

1. Berger, A., & Loutre, M. F. Insolation values for the climate of the last 10 million years. *Quaternary Science Reviews* **10**(4), 297–317 (1991).
2. Rae, J. W. B., et al. Atmospheric CO<sub>2</sub> over the past 66 million years from marine archives. *Annual Review of Earth and Planetary Sciences* **49**, 609–641 (2021).
